# Supplementary material for: Durum Wheat–Potato Crop Rotation, Soil Tillage, and Fertilization Source Affect Soil CO2 Emission and C Storage in the Mediterranean Environment
Source: MDPI journal article supplement (doi:10.3390/land12020326), 2023-01-25
Supplement: s1 [file s1]

Table S1. The ANOVA for the effects of the soil tillage practice, fertilization source, and year on the C balance in the two experimental years of durum wheat.

| Wheat                 |                    |                                  |                                   |                                       |                                       |
|-----------------------|--------------------|----------------------------------|-----------------------------------|---------------------------------------|---------------------------------------|
|                       | Degrees of Freedom | C-Input [Mg C ha <sup>-1</sup> ] | C-Output [Mg C ha <sup>-1</sup> ] | C In./C out. [Mg C ha <sup>-1</sup> ] | C Out./Grain [Mg C ha <sup>-1</sup> ] |
| Soil Tillage          | 2                  | 0.1376                           | 0.0002 *                          | 0.0080 *                              | 0.0097 *                              |
| Soil Fertilization    | 1                  | 0.0556                           | 0.0074 *                          | 0.8483                                | 0.0005 *                              |
| Tillage*Fertilization | 2                  | 0.9473                           | 0.0117 *                          | 0.7231                                | 0.1397                                |
| Year                  | 1                  | 0.0329 *                         | <0.0001 *                         | 0.0002 *                              | <0.0001 *                             |
| Tillage*Year          | 2                  | 0.0073 *                         | 0.2745                            | 0.1188                                | 0.0345 *                              |
| Fertilization*Year    | 1                  | 0.0373 *                         | 0.5125                            | 0.9747                                | 0.0354 *                              |
| Till.*Fert.*Year      | 2                  | 0.2002                           | 0.3743                            | 0.7921                                | 0.1899                                |
| Err. 1                | 12                 | 0.0422 *                         | 0.9960                            | 0.7781                                | 0.4793                                |
| Err. 2                | 12                 | -                                | -                                 | -                                     | -                                     |

Table S2. The ANOVA for the effects of the soil tillage practice, fertilization source, and year on the C balance in the two experimental years of potato crop.

| Potato                |                    |                                  |                                   |                                       |                                           |                                             |
|-----------------------|--------------------|----------------------------------|-----------------------------------|---------------------------------------|-------------------------------------------|---------------------------------------------|
|                       | Degrees of Freedom | C-Input [Mg C ha <sup>-1</sup> ] | C-Output [Mg C ha <sup>-1</sup> ] | C In./C out. [Mg C ha <sup>-1</sup> ] | C Out./Dry Tuber [Mg C ha <sup>-1</sup> ] | C Out./Fresh Tuber [Mg C ha <sup>-1</sup> ] |
| Soil Tillage          | 2                  | 0.0464 *                         | 0.8914                            | 0.9536                                | 0.8111                                    | 0.7445                                      |
| Soil Fertilization    | 1                  | <0.0001 *                        | 0.2402                            | <0.0001 *                             | 0.0912                                    | 0.0721                                      |
| Tillage*Fertilization | 2                  | 0.2602                           | 0.3929                            | 0.9123                                | 0.4523                                    | 0.5443                                      |
| Year                  | 1                  | <0.0001 *                        | 0.3707                            | 0.8076                                | <0.0001 *                                 | <0.0001 *                                   |
| Tillage*Year          | 2                  | 0.0280 *                         | 0.7560                            | 0.6005                                | 0.5611                                    | 0.3917                                      |
| Fertilization*Year    | 1                  | 0.2215                           | 0.6194                            | 0.1869                                | 0.9671                                    | 0.8581                                      |
| Till.*Fert.*Year      | 2                  | 0.4103                           | 0.8519                            | 0.9445                                | 0.7497                                    | 0.8841                                      |
| Err. 1                | 12                 | 0.6866                           | 0.6331                            | 0.6435                                | 0.1909                                    | 0.1221                                      |
| Err. 2                | 12                 | -                                | -                                 | -                                     | -                                         | -                                           |
